# Supplementary material for: Meta-Analysis for Quantifying Carbon Sequestration and Greenhouse Gas Emission in Paddy Soils One Year after Biochar Application
Source: MDPI journal article supplement (doi:10.3390/agronomy12123065), 2022-12-03
Supplement: s1 [file s1]

Archive with 1 entries (1 files):
- Supplementary material .pdf
