# Supplementary material for: Meta-Analysis for Quantifying Carbon Sequestration and Greenhouse Gas Emission in Paddy Soils One Year after Biochar Application
Source: MDPI journal article supplement (doi:10.3390/agronomy12123065), 2022-12-03
Supplement: s1 [file s1 › Supplementary material .pdf]

# Meta-Analysis for Quantifying Carbon Sequestration and Greenhouse Gas Emission in Biochar-Amended Paddy Soil after One-year of Application

Fei Bu<sup>1,2</sup>, Qiong Nan<sup>3</sup>, Wushuang Li<sup>1,2</sup>, Nanthi Bolan<sup>4,5</sup>, Binoy Sarkar<sup>6</sup>, Jun Meng<sup>1,2,\*</sup>, Hailong Wang<sup>7,8,\*</sup>

<sup>1</sup> National Biochar Institute, Shenyang Agricultural University, Shenyang, 110866, P. R. China

<sup>2</sup> Key Laboratory of Biochar and Soil Improvement, Ministry of Agriculture and Rural Affairs, Shenyang, 110866, P. R. China

<sup>3</sup> Institute of Environment Pollution Control and Treatment, College of Environment and Resource Science, Zhejiang University, Hangzhou 310029, P. R. China

<sup>4</sup> School of Agriculture and Environment, The University of Western Australia, Perth, WA 6001, Australia

<sup>5</sup> The UWA Institute of Agriculture, The University of Western Australia, Perth, WA 6001, Australia

<sup>6</sup> Future Industries Institute, University of South Australia, Mawson Lakes, SA 5095, Australia

<sup>7</sup> School of Environmental and Chemical Engineering, Foshan University, Foshan 528000, P. R. China

<sup>8</sup> Key Laboratory of Soil Contamination Bioremediation of Zhejiang Province, Zhejiang A&F University, Hangzhou, 311300, P. R. China

\* Correspondence: mengjun1217@syau.edu.cn (J.M); hailong.wang@fosu.edu.cn (H.W.)

**Abstract:** Incorporation of biochar into soil has been recognized as a promising method to combat climate change. However, the full carbon reduction potential of biochar in paddy soil is still unclear. To give an overview of the quantified carbon reduction, a meta-analysis model of different carbon emission factors was established, and the life cycle-based carbon reduction of biochar was estimated. After one year of incorporation, biochar significantly increased the total soil carbon (by 27.2%) and rice production (by 11.3%); stimulated methane (CH<sub>4</sub>) and carbon dioxide (CO<sub>2</sub>) emission respectively by 13.6 and 1.41% but having insignificant differences with no biochar amendment; and reduced nitrous oxide (N<sub>2</sub>O) emission by 25.1%. Soil total carbon increase was mainly related to biochar rate, whereas CH<sub>4</sub> emission was related to nitrogen fertilizer application rate. Biochar pyrolysis temperature, soil type, and climate were the main factors to influence the rice yield. The total carbon reduction potential of biochar incorporation in Chinese paddy soil in 2020 ranged from 0.0066 to 2.0 Pg C within biochar incorporation rate from 2 to 40 t ha<sup>-1</sup>. This study suggests that biochar application has a high potential to reduce carbon emissions contributing to the carbon neutrality goal but needs field-scale long-term trials to validate the predictions.

**Keywords:** carbon reduction; soil organic carbon; carbon emission; climate change

## Supplementary information

Table S1. References for meta-analysis

| Number | Main authours                 | Title                                                                                                                                                                     | Journal                                      | Year | References   |
|--------|-------------------------------|---------------------------------------------------------------------------------------------------------------------------------------------------------------------------|----------------------------------------------|------|--------------|
| 1.     | Shihong Yang,<br>Ya'nan Xiao  | Biochar improved rice yield and mitigated CH <sub>4</sub> and N <sub>2</sub> O emissions from paddy field under controlled irrigation in the Taihu Lake Region of China   | Atmospheric Environment                      | 2019 | <sup>1</sup> |
| 2.     | Afeng Zhang,<br>Rongjun Bian  | Enhanced rice production but greatly reduced carbon emission following biochar amendment in a metal-polluted rice paddy.                                                  | Environmental Science and Pollution Research | 2015 | <sup>2</sup> |
| 3.     | Jinyang Wang,<br>Xiaojian Pan | Effects of biochar amendment in two soils on greenhouse gas emissions and crop production.                                                                                | Plant and Soil                               | 2012 | <sup>3</sup> |
| 4.     | Yanghui Sui,<br>Jiping Gao    | Interactive effects of straw-derived biochar and N fertilization on soil C storage and rice productivity in rice paddies of Northeast China.                              | Science of the Total Environment             | 2016 | <sup>4</sup> |
| 5.     | Yanan Xiao,<br>Shihong Yang   | Effect of Biochar Amendment on Methane Emissions from Paddy Field under Water-Saving Irrigation.                                                                          | Sustainability                               | 2018 | <sup>5</sup> |
| 6.     | Liyang Sun,<br>Junyin Deng    | Combined effects of nitrogen fertilizer and biochar on greenhouse gas emissions and net ecosystem economic budget from a coastal saline rice field in southeastern China. | Environmental Science and Pollution Research | 2020 | <sup>6</sup> |
| 7.     | Yuefeng Cui,<br>Jun Meng      | Effects of straw and biochar addition on soil nitrogen, carbon, and super rice yield in cold waterlogged paddy soils of North China.                                      | Journal of Integrative Agriculture           | 2017 | <sup>7</sup> |
| 8.     | Qiong Nan,<br>Cheng Wang      | Mitigating methane emission via annual biochar amendment pyrolyzed with rice straw from the same paddy field.                                                             | Science of the Total Environment             | 2020 | <sup>8</sup> |
| 9.     | Shuwei Wang,<br>Shutan Ma     | A 2-year study on the effect of biochar on methane and nitrous oxide emissions in an intensive                                                                            | Biochar                                      | 2019 | <sup>9</sup> |

---

|     |                              |                                                                                                                                                                                  |                                                                               |      |    |
|-----|------------------------------|----------------------------------------------------------------------------------------------------------------------------------------------------------------------------------|-------------------------------------------------------------------------------|------|----|
| 10. | Jianlin Shen,<br>Hong Tang   | rice–wheat cropping system.<br>Contrasting effects of straw and<br>straw-derived biochar<br>amendments on greenhouse gas<br>emissions within double rice<br>cropping systems.    | Agriculture,<br>Ecosystems &<br>Environment                                   | 2014 | 10 |
| 11. | Afeng Zhang,<br>Rongjun Bian | Change in net global warming<br>potential of a rice–wheat<br>cropping system with biochar<br>soil amendment in a rice paddy<br>from China.                                       | Agriculture,<br>Ecosystems and<br>Environment                                 | 2013 | 11 |
| 12. | Afeng Zhang,<br>Rongjun Bian | Effects of biochar amendment<br>on soil quality, crop yield and<br>greenhouse gas emission in a<br>Chinese rice paddy: A field<br>study of 2 consecutive rice<br>growing cycles. | Field Crops<br>Research                                                       | 2012 | 12 |
| 13. | Afeng Zhang,<br>Liqiang Cui  | Effect of biochar amendment on<br>yield and methane and nitrous<br>oxide emissions from a rice<br>paddy from Tai Lake plain                                                      | Agriculture,<br>Ecosystems and<br>Environment                                 | 2010 | 13 |
| 14. | Zhen Wu, Xi<br>Zhang         | Biochar amendment reduced<br>greenhouse gas intensities in the<br>rice-wheat rotation system:<br>six-year field observation and<br>meta-analysis.                                | Agricultural and<br>Forest<br>Meteorology                                     | 2019 | 14 |
| 15. | Shihong Yang,<br>Zewei Jiang | Effects of Biochar Amendment<br>on CO <sub>2</sub> Emissions from Paddy<br>Fields under Water-Saving<br>Irrigation.                                                              | International<br>Journal of<br>Environmental<br>Research and<br>Public Health | 2018 | 15 |

---

Table S2. Prediction of soil total carbon content in paddy field with different biochar incorporation

| rate      |        |        |        |
|-----------|--------|--------|--------|
| BC amount | LCI    | UCI    | Pred   |
| 1.78      | 1.0278 | 1.2019 | 1.1115 |
| 2         | 1.0299 | 1.2029 | 1.113  |
| 10        | 1.1057 | 1.2425 | 1.1721 |
| 14.8      | 1.1508 | 1.2702 | 1.209  |
| 20        | 1.1969 | 1.3061 | 1.2503 |
| 25        | 1.2362 | 1.349  | 1.2913 |
| 29.6      | 1.2674 | 1.3963 | 1.3303 |
| 40        | 1.3268 | 1.5257 | 1.4227 |

Note: LCI for bottom of 95% confidence interval; UCI for ceiling of 95% confidence interval; Pred stands for soil total carbon content ratio treatment group to control group. Same to the following tables

Table S3. Effect size of CO<sub>2</sub> emission with biochar amendment strategy under temperate continental monsoon climate

| Climate                               | Estimate | Se     | pval   | LCI    | UCI    | Significance |
|---------------------------------------|----------|--------|--------|--------|--------|--------------|
| Temperate continental monsoon climate | 0.1129   | 0.0565 | 0.0456 | 0.0022 | 0.2236 | *            |

Table S4. Key environmental factors affecting carbon emission

| Items            | Environment factor types | pval     | Significance |
|------------------|--------------------------|----------|--------------|
| Yield            | soil                     | 0.00747  | **           |
|                  | N                        | 0.0478   | *            |
| CH <sub>4</sub>  | N                        | 0.00414  | **           |
|                  | soil                     | <2e-16   | ***          |
| N <sub>2</sub> O | soil                     | 3.58E-12 | ***          |
| CO <sub>2</sub>  | soil                     | 0.000211 | ***          |
|                  | climate                  | 8.31E-06 | ***          |

Table S5. Default value of carbon emission factors

| Carbon emission items                                   | Environment factors                   | Default | Se      |
|---------------------------------------------------------|---------------------------------------|---------|---------|
| Soil total carbon (g kg <sup>-1</sup> )                 | Stagnic Anthrosols                    | 22.75   | ±3.74   |
|                                                         | Hydragric Anthrosols                  | 12.08   | ±0.164  |
|                                                         | Chloridic Solonchaks                  | 10.95   | ±1.45   |
|                                                         | Gleyic Luvisols                       | 12.49   | ±0.42   |
|                                                         | Gleyic Stagnic Anthrosols             | 26.50   | ±0.9    |
|                                                         | Eutric Cambisols                      | 6.375   | ±0.9    |
| Yield (t ha <sup>-1</sup> )                             | Ultisol                               | 10.30   | ±0.23   |
|                                                         | Stagnic Anthrosols                    | 6.99    | ±2.89   |
|                                                         | Chloridic Solonchaks                  | 7.45    | ±1.89   |
|                                                         | Hydragric Anthrosols                  | 6.91    | ±1.54   |
|                                                         | Gleyic Stagnic Anthrosols             | 10.22   | ±0.94   |
|                                                         | Gleyic Luvisols                       | 8.32    | ±0.13   |
|                                                         | Eutric Cambisols                      | 7.82    | ±1.79   |
| CO <sub>2</sub> (kg ha <sup>-1</sup> d <sup>-1</sup> )  | Subtropical monsoon climate           | 11.31   | ±8.89   |
|                                                         | Temperate continental monsoon climate | 88.33   | ±32.06  |
| CH <sub>4</sub> (kg ha <sup>-1</sup> d <sup>-1</sup> )  | Stagnic Anthrosols                    | 0.32    | ±0.24   |
|                                                         | Chloridic Solonchaks                  | 1.25    | ±0.90   |
|                                                         | Hydragric Anthrosols                  | 0.72    | ±0.38   |
|                                                         | Gleyic Stagnic Anthrosols             | 0.28    | ±0.035  |
|                                                         | Gleyic Luvisols                       | 3.32    | ±0.32   |
|                                                         | Eutric Cambisols                      | 0.34    | ±0.1052 |
| N <sub>2</sub> O (kg ha <sup>-1</sup> d <sup>-1</sup> ) | Gleyic Luvisols                       | 0.0060  | ±0.0009 |
|                                                         | Gleyic Stagnic Anthrosols             | 0.0014  | ±0.0002 |
|                                                         | Hydragric Anthrosols                  | 0.0203  | ±0.0257 |
|                                                         | Chloridic Solonchaks                  | 0.0032  | ±0.0021 |
|                                                         | Stagnic Anthrosols                    | 0.0086  | ±0.0086 |

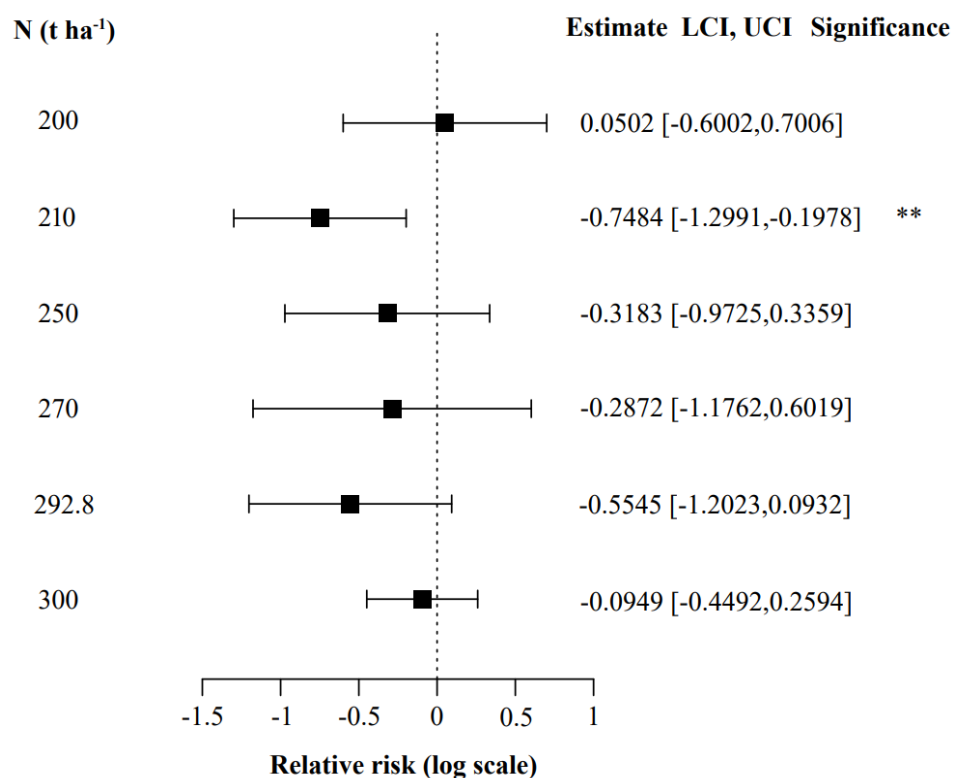

Figure S1. Effect size of CH<sub>4</sub> emission with nitrogen fertilizer under biochar amendment strategy

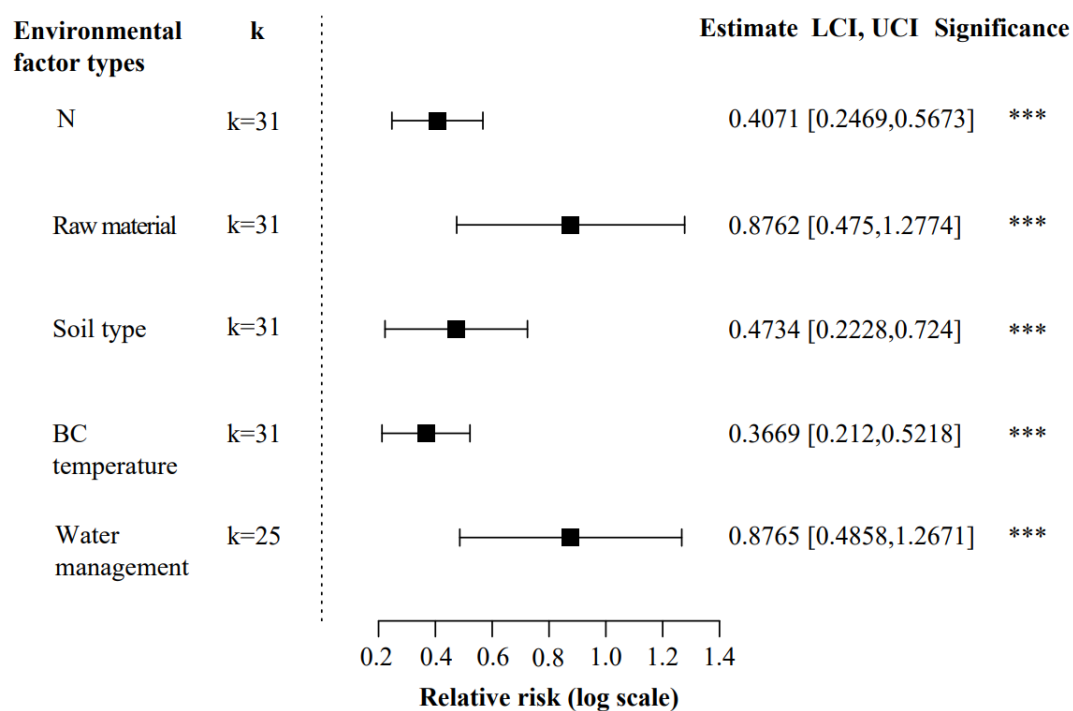

Figure S2. Effect size of CH<sub>4</sub> stimulation with nitrogen fertilizer under biochar amendment strategy

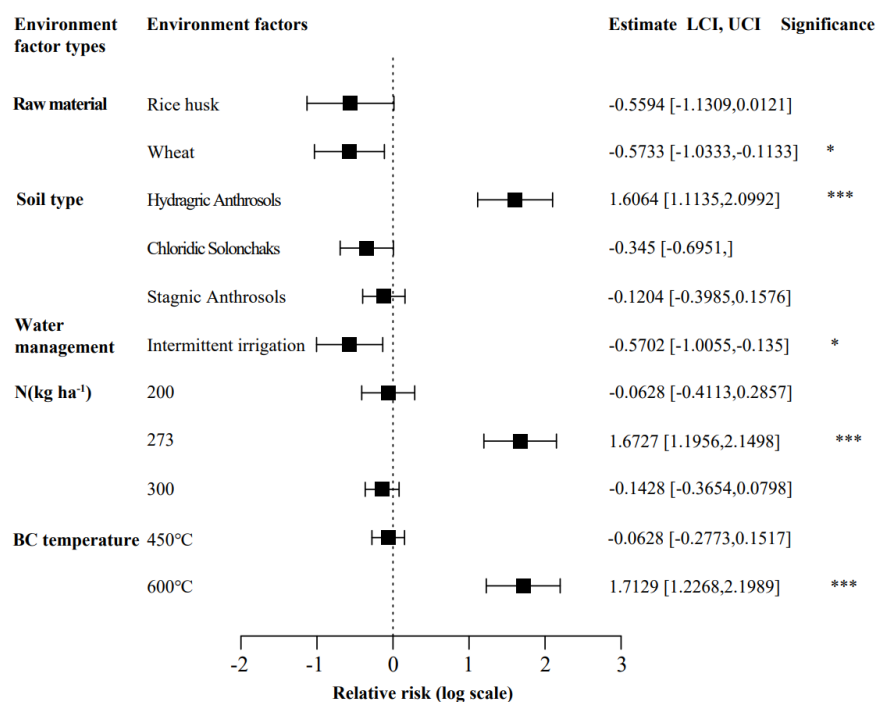

Figure S3. CH<sub>4</sub> emission promotion factor exploration

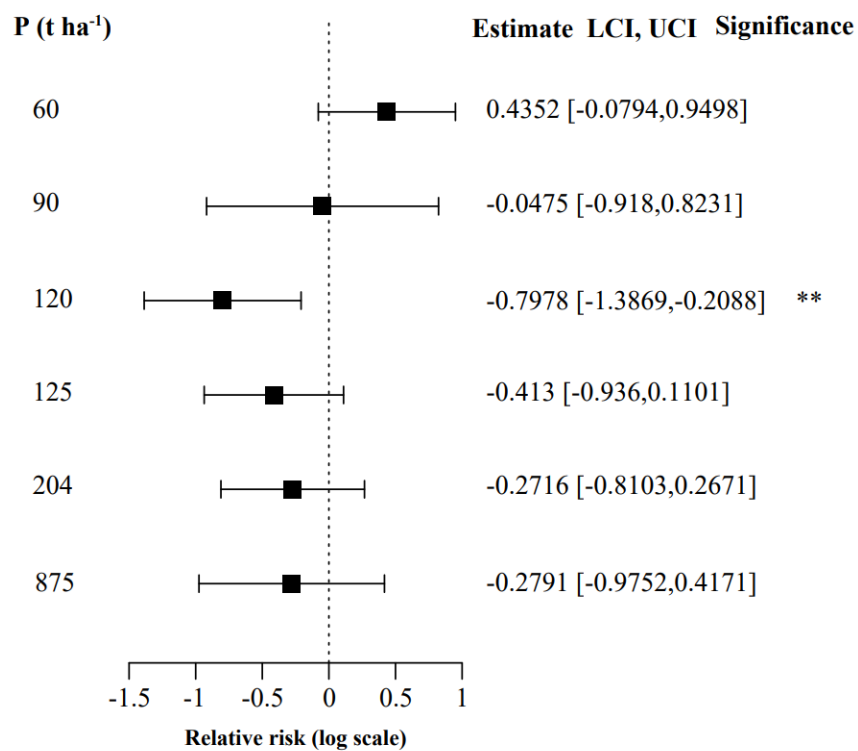

Figure S4. Effect size of N<sub>2</sub>O emission with phosphate fertilizer under biochar amendment strategy

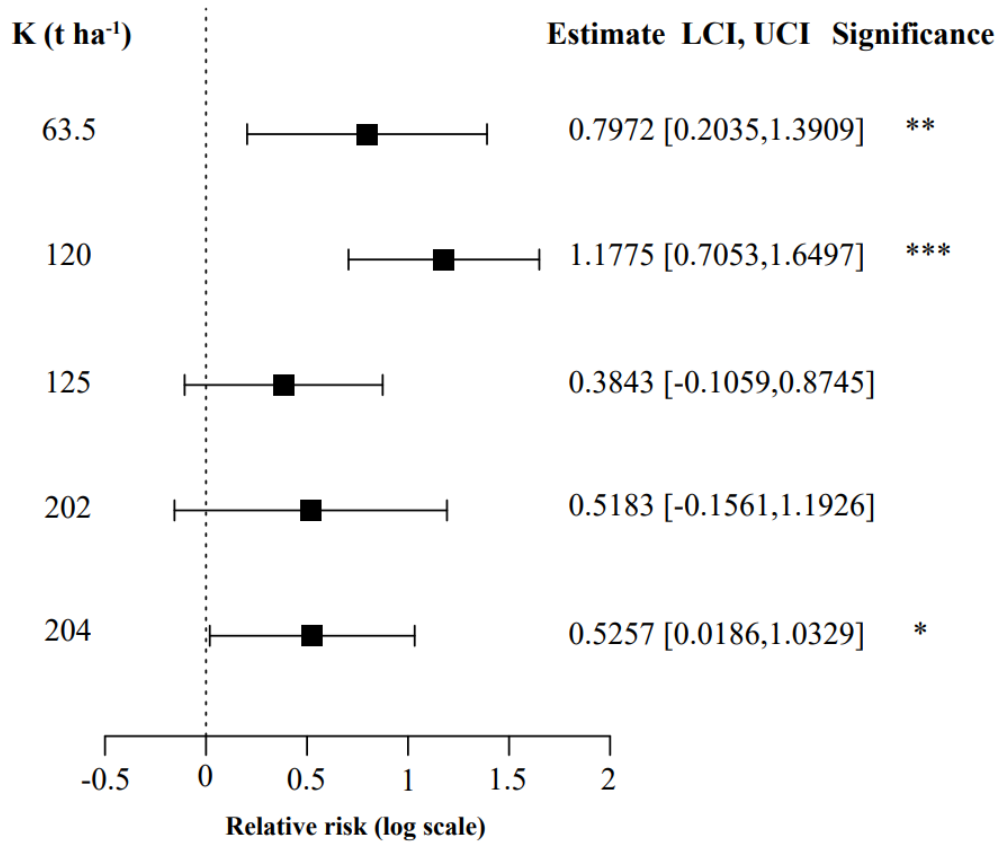

Figure S5. Effect size of N<sub>2</sub>O emission with potassium fertilizer under biochar amendment strategy

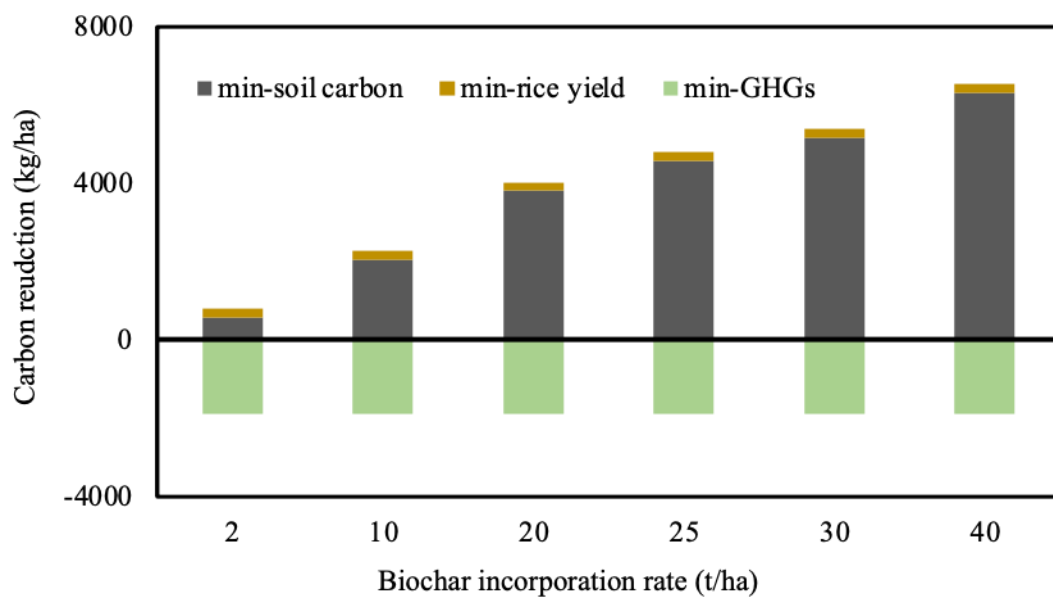

Figure S6. The minimal carbon potential with biochar incorporation into paddy soil

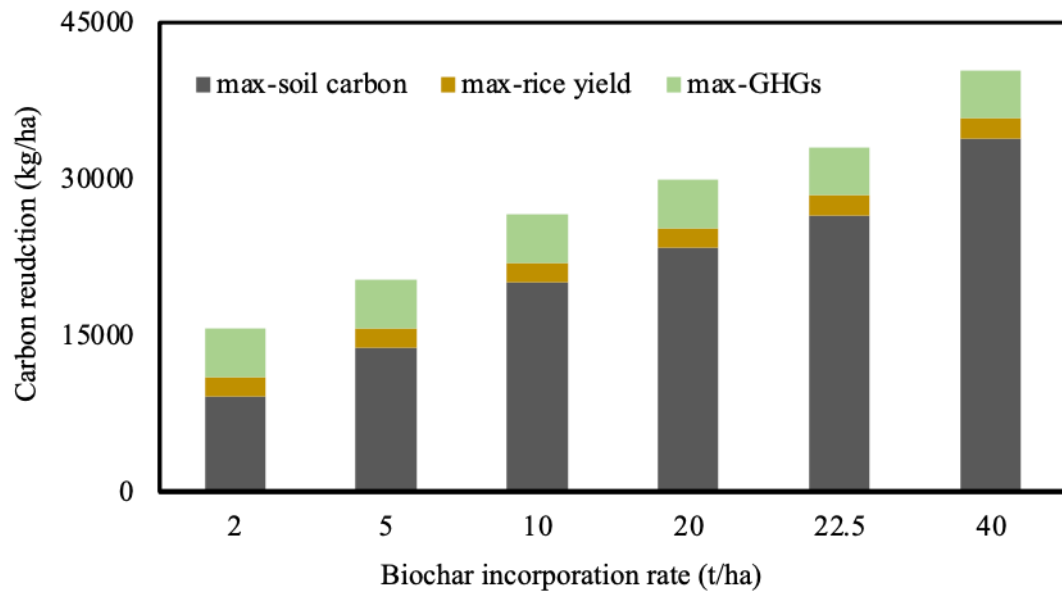

Figure S7. The maximal carbon potential with biochar incorporation into paddy soil

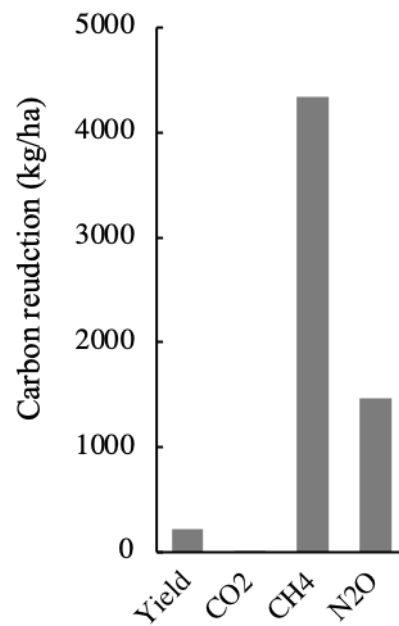

Figure S8. The minimal carbon reduction induced by rice yield promotion and carbon emission from GHGs with biochar incorporation in paddy field.

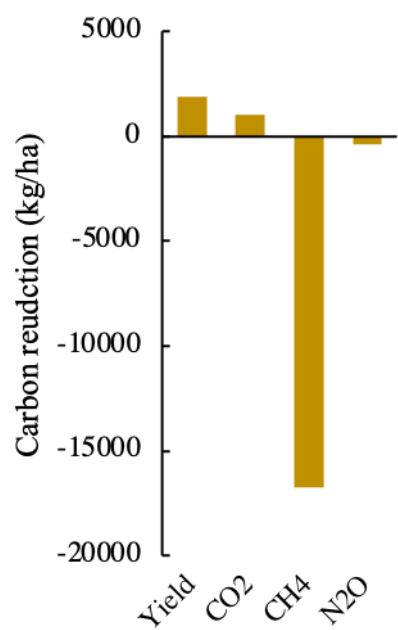

Figure S9. The maximal carbon reduction induced by rice yield promotion and GHGs mitigation with biochar incorporation in paddy field.

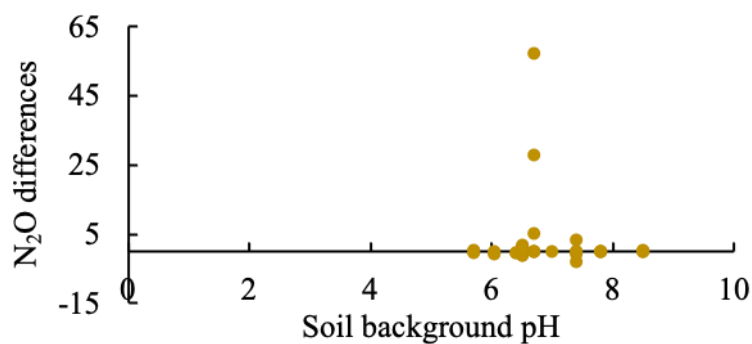

Figure S10. The relationship of soil background pH and N<sub>2</sub>O difference with biochar amendment. Positive values represent for N<sub>2</sub>O stimulation and negative values represent for N<sub>2</sub>O reduction after biochar was incorporated.

## References:

1. Yang, S.; Xiao, Y. N.; Sun, X.; Ding, J.; Jiang, Z.; Xu, J., Biochar improved rice yield and mitigated CH<sub>4</sub> and N<sub>2</sub>O emissions from paddy field under controlled irrigation in the Taihu Lake Region of China. *Atmospheric Environment* **2019**, *200*, 69-77.
2. Zhang, A.; Bian, R.; Li, L.; Wang, X.; Zhao, Y.; Hussain, Q.; Pan, G., Enhanced rice production but greatly reduced carbon emission following biochar amendment in a metal-polluted rice paddy. *Environ Sci Pollut Res Int* **2015**, *22*, (23), 18977-86.
3. Wang, J.; Pan, X.; Liu, Y.; Zhang, X.; Xiong, Z., Effects of biochar amendment in two soils on greenhouse gas emissions and crop production. *Plant and Soil* **2012**, *360*, (1-2), 287-298.
4. Sui, Y.; Gao, J.; Liu, C.; Zhang, W.; Lan, Y.; Li, S.; Meng, J.; Xu, Z.; Tang, L., Interactive effects of straw-derived biochar and N fertilization on soil C storage and rice productivity in rice paddies of Northeast China. *Sci Total Environ* **2016**, *544*, 203-10.
5. Xiao, Y.; Yang, S.; Xu, J.; Ding, J.; Sun, X.; Jiang, Z., Effect of Biochar Amendment on Methane Emissions from Paddy Field under Water-Saving Irrigation. *Sustainability* **2018**, *10*, (5).
6. Sun, L.; Deng, J.; Fan, C.; Li, J.; Liu, Y., Combined effects of nitrogen fertilizer and biochar on greenhouse gas emissions and net ecosystem economic budget from a coastal saline rice field in southeastern China. *Environ Sci Pollut Res Int* **2020**, *27*, (14), 17013-17022.
7. Cui, Y.; Meng, J.; Wang, Q.; Zhang, W.; Cheng, X.; Chen, W., Effects of straw and biochar addition on soil nitrogen, carbon, and super rice yield in cold waterlogged paddy soils of North China. *Journal of Integrative Agriculture* **2017**, *16*, (5), 1064-1074.
8. Nan, Q.; Wang, C.; Wang, H.; Yi, Q.; Wu, W., Mitigating methane emission via annual biochar amendment pyrolyzed with rice straw from the same paddy field. *Sci Total Environ* **2020**, *746*, 141351.
9. Wang, S.; Ma, S.; Shan, J.; Xia, Y.; Lin, J.; Yan, X., A 2-year study on the effect of biochar on methane and nitrous oxide emissions in an intensive rice–wheat cropping system. *Biochar* **2019**, *1*, (2), 177-186.
10. Shen, J.; Tang, H.; Liu, J.; Wang, C.; Li, Y.; Ge, T.; Jones, D. L.; Wu, J., Contrasting effects of straw and straw-derived biochar amendments on greenhouse gas emissions within double rice cropping systems. *Agriculture, Ecosystems & Environment* **2014**, *188*, 264-274.
11. Zhang, A.; Bian, R.; Hussain, Q.; Li, L.; Pan, G.; Zheng, J.; Zhang, X.; Zheng, J., Change in net global warming potential of a rice–wheat cropping system with biochar soil amendment in a rice paddy from China. *Agriculture, Ecosystems & Environment* **2013**, *173*, 37-45.
12. Zhang, A.; Bian, R.; Pan, G.; Cui, L.; Hussain, Q.; Li, L.; Zheng, J.; Zheng, J.; Zhang, X.; Han, X.; Yu, X., Effects of biochar amendment on soil quality, crop yield and greenhouse gas emission in a Chinese rice paddy: A field study of 2 consecutive rice growing cycles. *Field Crops Research* **2012**, *127*, 153-160.
13. Zhang, A.; Cui, L.; Pan, G.; Li, L.; Hussain, Q.; Zhang, X.; Zheng, J.; Crowley, D., Effect of biochar amendment on yield and methane and nitrous oxide emissions from a rice paddy from Tai Lake plain, China. *Agriculture, Ecosystems & Environment* **2010**, *139*, (4), 469-475.
14. Wu, Z.; Zhang, X.; Dong, Y.; Li, B.; Xiong, Z., Biochar amendment reduced greenhouse gas intensities in the rice-wheat rotation system: six-year field observation and meta-analysis. *Agricultural and Forest Meteorology* **2019**, 278.
15. Yang, S.; Jiang, Z.; Sun, X.; Ding, J.; Xu, J., Effects of Biochar Amendment on CO<sub>2</sub> Emissions from Paddy Fields under Water-Saving Irrigation. *Int J Environ Res Public Health* **2018**, *15*, (11).
